# Supplementary material for: A systematic review investigating patient knowledge and awareness on the association between oral health and their systemic condition
Source: Springer Nature journal article supplement (doi:10.1186/s12889-021-12016-9), 2021-11-12
Supplement: MOESM4 [file 19861786]

**Additional file 4: JBI-critical appraisal checklist for analytical cross-sectional studies**

| <b>Study</b>                         | <b>Q1</b> | <b>Q2</b> | <b>Q3</b> | <b>Q4</b> | <b>Q5</b> | <b>Q6</b> | <b>Q7</b> | <b>Q8</b> | <b>Quality</b> | <b>Overall appraisal</b> |
|--------------------------------------|-----------|-----------|-----------|-----------|-----------|-----------|-----------|-----------|----------------|--------------------------|
| <b>Mian et al. (2020)</b>            | Y         | Y         | Y         | Y         | N         | N         | Y         | Y         | Fair           | Include                  |
| <b>Hollatz et al. (2019)</b>         | Y         | Y         | U         | Y         | Y         | Y         | N         | Y         | Fair           | Include                  |
| <b>Parakh et al. (2019)</b>          | Y         | Y         | Y         | Y         | N         | N         | Y         | Y         | Fair           | Include                  |
| <b>Sanchez et al. (2019)</b>         | Y         | Y         | Y         | Y         | Y         | Y         | Y         | Y         | High           | Include                  |
| <b>Rotman-Pikielny et al. (2019)</b> | Y         | Y         | Y         | Y         | Y         | N         | Y         | Y         | High           | Include                  |
| <b>Wang et al. (2019)</b>            | U         | Y         | Y         | Y         | N         | N         | Y         | Y         | Fair           | Include                  |
| <b>Naorungroj et al. (2018)</b>      | Y         | Y         | Y         | Y         | N         | N         | Y         | Y         | Fair           | Include                  |
| <b>Afolabi et al. (2017)</b>         | Y         | Y         | U         | Y         | N         | N         | U         | Y         | Fair           | Include                  |
| <b>Al Amassi et al. (2017)</b>       | Y         | Y         | Y         | Y         | Y         | N         | Y         | Y         | High           | Include                  |
| <b>Kejriwal et al. (2017)</b>        | Y         | Y         | Y         | Y         | N         | N         | Y         | Y         | High           | Include                  |
| <b>Lasisi et al. (2017)</b>          | Y         | Y         | Y         | Y         | N         | N         | Y         | Y         | High           | Include                  |
| <b>Payal et al. (2017)</b>           | Y         | Y         | U         | Y         | N         | N         | U         | Y         | Fair           | Include                  |
| <b>Shanmukappa et al. (2017)</b>     | U         | Y         | Y         | Y         | N         | N         | Y         | Y         | Fair           | Include                  |
| <b>Gaffar et al. (2016)</b>          | Y         | Y         | Y         | Y         | Y         | Y         | Y         | Y         | High           | Include                  |
| <b>Rasouli-Ghahro et al. (2016)</b>  | U         | Y         | Y         | Y         | Y         | N         | Y         | N         | Fair           | Include                  |
| <b>Ummadisetty et al. (2016)</b>     | Y         | Y         | Y         | Y         | N         | N         | Y         | Y         | Fair           | Include                  |
| <b>Malkwai et al. (2014)</b>         | Y         | Y         | Y         | Y         | N         | N         | Y         | Y         | Fair           | Include                  |
| <b>Sahril et al. (2014)</b>          | Y         | Y         | Y         | Y         | U         | U         | Y         | Y         | High           | Include                  |
| <b>Weinspach et al. (2013)</b>       | N         | Y         | U         | Y         | Y         | Y         | U         | Y         | Fair           | Include                  |
| <b>Aggarwal et al. (2012)</b>        | Y         | Y         | U         | Y         | N         | N         | U         | Y         | Fair           | Include                  |
| <b>Abiola et al. (2011)</b>          | U         | Y         | U         | Y         | U         | Y         | U         | Y         | Fair           | Include                  |
| <b>Bangash et al. (2011)</b>         | Y         | Y         | Y         | Y         | U         | U         | U         | U         | Fair           | Include                  |

---

|                                   |   |   |   |   |   |   |   |   |      |         |
|-----------------------------------|---|---|---|---|---|---|---|---|------|---------|
| <b>Bowyer et al.<br/>(2011)</b>   | Y | Y | U | Y | Y | N | U | Y | Fair | Include |
| <b>Eldarrat et al.<br/>(2011)</b> | Y | Y | U | Y | N | N | U | Y | Fair | Include |

---

Y – Yes, N – No, U – Unclear.
